# Supplementary material for: Spatial distribution and trends of different precipitation variability indices based on daily data in Northern Chile between 1966 and 2015
Source: Copernicus journal article supplement (doi:10.5194/hess-2018-371), 2018-08-06
Supplement: Supplementary file [file hess-2018-371-AC7-supplement.pdf]

## Anonymous Referee #1

The Authors addressed all the main issues of my review.

The authors would like to thank the reviewer for his work regarding the comments on this manuscript and his nice words. We agree with all the of them and we think that those will help to give a more accurate work. We also hope that the reviewer will now be satisfied with the last version.

A few final remarks:

- given the high % of missing data, you might flag stations with more than 50% of missing data with a different color or symbol in figure 1.

It has been done as proposed. Stations with more than 50% of missing data are marked with a cross instead of with a dot.

- remove the decimals beyond the second in the legend figures 5-8.

It has been done as proposed. The new figures have been added to the manuscript.

- did you compare your results with those of Sanguesa et al. (2018)?

Sanguesa et al. (2012) have proposed a very interesting work applied to Central Chile applying the Gini index to daily precipitation. However, to these author's minds, the work lacks of a good methodological approach. It has been discussed in another recently published work (Sarricolea et al., 2019). Moreover, the methodology and the study area are different from those considered in the present manuscript.

- add the reference to the paper of Cortesi et al. (2012) in the bibliography

It has been done as proposed.

Grammar revision:

- Page 1 line 15: replace the first "to" with "in"

It has been corrected.

- Page 1 line 19: replace "caused" with "measured"

It has been modified.

- Page 1 line 19: remove 'determined' and add 'was determined' after 'distribution'

It has been done as proposed.

- Page 1 line 25 and 26: replace 'doing' with a more appropriate verb

It has been replaced by "helping to develop".

- Page 2 line 8: add 'in' after 'recorded'

It has been added.

- Page 2 line 24: remove 'but'

It has been removed.

- Page 3 line 9: I don't understand very well the new sentence

The authors tried to emphasize the importance of considering such many aspects of both spatial and temporal behaviour of precipitation, not only considering monthly/daily accumulated.

- Page 10 line 2: replace 'by mean' with 'by means'

It has been done, in line 13, page 10.
